# Supplementary material for: Charge accumulation kinetics at a liquid–solid interface depend on liquid chemistry
Source: Royal Society of Chemistry journal article supplement (doi:10.1039/d3ta03727d), 2023-01-01
Supplement: d3ta03727d1.pdf [file d3ta03727d1.pdf]

## Supporting Information

### Charge accumulation kinetics at a liquid-solid interface depend on liquid chemistry

*Xin Liu*<sup>1,2#</sup>, *Jinyang Zhang*<sup>2,3#</sup>, *Xuejiao Wang*<sup>2,4#</sup>, *Shiquan Lin*<sup>2,3</sup>, and *Zhong Lin Wang*<sup>2,3,5,\*</sup>

1. College of engineering, Zhejiang Normal University, Zhejiang 321000, P. R. China
2. Beijing Institute of Nanoenergy and Nanosystems, Chinese Academy of Sciences, Beijing 100083, P. R. China
3. School of Nanoscience and Technology, University of Chinese Academy of Sciences, Beijing 100049, P. R. China
4. Center on Nanoenergy Research, School of Physical Science and Technology, Guangxi University, Nanning, Guangxi 530004, P.R. China
5. Georgia Institute of Technology, Atlanta, GA 30332-0245, USA

E-mail: [zlwang@gatech.edu](mailto:zlwang@gatech.edu)

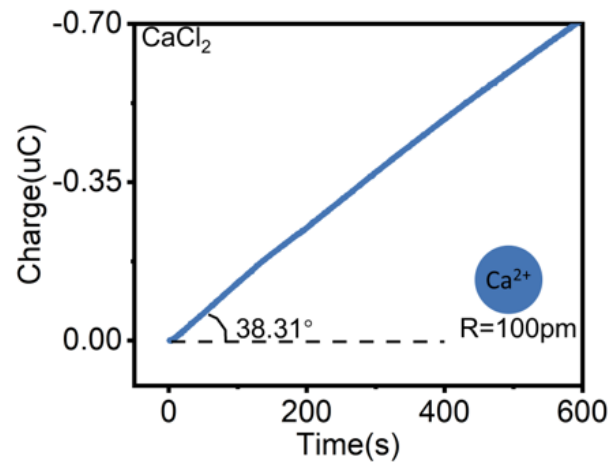

**Figure S1.** Charge accumulation rates of 1M CaCl<sub>2</sub> contacting with FEP.

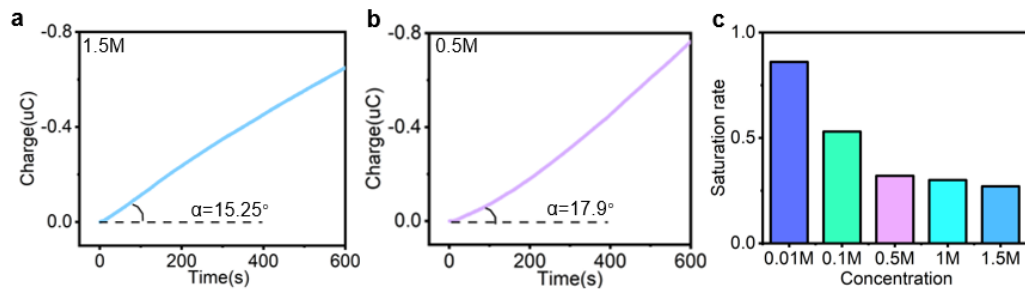

**Figure S2. Relationship between solution concentrations and charge accumulation rates.** (a and b) Charge accumulation rate curves for 1.5 M and 0.5 M  $\text{CaCl}_2$  solutions. (c) Charge accumulation rates for different concentrations of  $\text{CaCl}_2$  solutions.

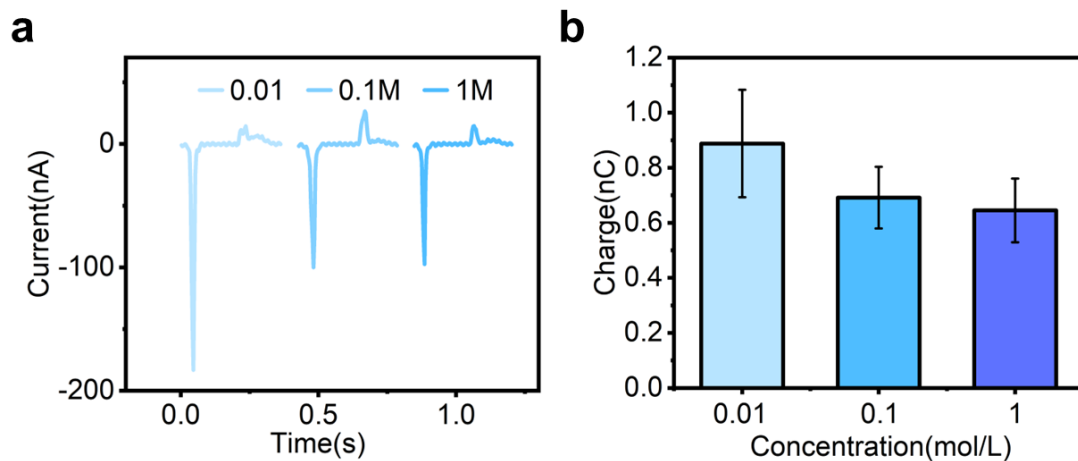

**Figure S3. Current curves and corresponding transferred charges of CaCl<sub>2</sub> droplets of different concentrations at first droplet.** (a) Current curves for CaCl<sub>2</sub> droplets of different concentrations. (b) Transferred charges of CaCl<sub>2</sub> droplets of different concentrations.
